# Supplementary material for: Susceptibility to Vaccine-Preventable Diseases in Four Districts of Xaysomboun Province, Lao People’s Democratic Republic
Source: MDPI journal article supplement (doi:10.3390/vaccines10030463), 2022-03-17
Supplement: s1 [file s1]

**Table S1.** Factors associated with anti-HBc and HBsAg positivity.

[illegible]

|                       |                |                  |     |    |    |              |                   |    |    |    |
|-----------------------|----------------|------------------|-----|----|----|--------------|-------------------|----|----|----|
| < 1,000,000           | 22/33 (66.7)   |                  |     |    |    | 2/33 (6.1)   | 1.0               |    |    |    |
| 1,000,000 - 3,000,000 | 164/301 (54.5) | 0.59 [0.28-1.27] | 0.1 | NA | NA | 28/301 (9.3) | 1.58 [0.36-6.99]  | NS | NA | NA |
| > 3,000,000           | 18/29 (62.1)   | 0.81 [0.28-2.32] | NS  | NS | NS | 4/29 (13.8)  | 2.48 [0.41-14.66] | NS | NA | NA |

Categories were included in multivariable analysis when  $p \leq 0.2$  for one of the variables.  
NS=non-significant, NA=Not appropriate/not included in multivariable analysis.

**Table S2.** Factors associated with serological profile suggestive of previous vaccination (anti-HBs positive/anti-HBc negative).

|                           | <i>n/N (%)</i> | <i>Crude OR [95% CI]</i> | <i>p-value</i> | <i>Adjusted OR [95% CI]</i> | <i>p-value</i> |
|---------------------------|----------------|--------------------------|----------------|-----------------------------|----------------|
| <b>Total</b>              | 50/363 (13.8)  |                          |                |                             |                |
| <b>Sex</b>                |                |                          |                |                             |                |
| Female                    | 21/222 (9.5)   | 1.0                      |                |                             |                |
| Male                      | 29/141 (20.6)  | 2.47 [1.35-4.54]         | 0.003          | 2.06 [1.10-3.86]            | 0.02           |
| <b>Age groups (years)</b> |                |                          |                |                             |                |
| 5-10                      | 21/72 (29.2)   | 1.0                      |                |                             |                |
| 11-20                     | 15/85 (17.6)   | 0.52 [0.24-1.10]         | 0.09           |                             |                |
| 21-30                     | 6/66 (9.1)     | 0.24 [0.09-0.64]         | 0.005          | 0.25 [0.09-0.68]            | 0.007          |
| 31-40                     | 0/45 (0)       |                          |                |                             |                |
| > 40                      | 8/95 (8.4)     | 0.22 [0.09-0.54]         | 0.001          | 0.23 [0.09-0.57]            | 0.001          |
| <b>Ethnicity</b>          |                |                          |                |                             |                |
| Lao-Tai                   | 16/141 (11.3)  | 1.0                      |                |                             |                |
| Hmong-Mien                | 28/156 (17.9)  | 1.70 [0.88-3.31]         | 0.1            | NS                          | NS             |
| Mone-Kmae                 | 6/66 (9.1)     | 0.78 [0.29-2.09]         | NS             | NS                          | NS             |
| <b>Religion</b>           |                |                          |                |                             |                |
| Animist                   | 37/243 (15.2)  | 1.0                      |                |                             |                |
| Buddhist                  | 13/120 (10.8)  | 0.67 [0.34-1.32]         | 0.2            | NS                          | NS             |
| <b>District</b>           |                |                          |                |                             |                |
| Longxarn                  | 11/93 (11.8)   | 1.0                      |                |                             |                |
| Hom                       | 16/83 (19.3)   | 1.78 [0.77-4.09]         | 0.1            | NS                          | NS             |
| Longchaeng                | 12/82 (14.6)   | 1.27 [0.53-3.07]         | NS             | NS                          | NS             |
| Thathom                   | 11/105 (10.5)  | 0.87 [0.35-2.11]         | NS             | NS                          | NS             |
| <b>Place of birth</b>     |                |                          |                |                             |                |
| Provincial hospital       | 7/18 (38.9)    | 1.0                      |                |                             |                |
| District hospital         | 11/41 (26.8)   | 0.57 [0.17-1.86]         | NS             | NS                          | NS             |
| Health care center        | 5/19 (26.3)    | 0.56 [0.13-2.26]         | NS             | NS                          | NS             |
| At home                   | 27/285 (9.5)   | 0.16 [0.05-0.45]         | 0.001          | NS                          | NS             |
| <b>Marital status</b>     |                |                          |                |                             |                |
| Single                    | 37/155 (23.9)  | 1.0                      |                |                             |                |
| Married                   | 13/208 (6.2)   | 0.21 [0.10-0.41]         | <0.001         | NS                          | NS             |
| <b>Education</b>          |                |                          |                |                             |                |
| None                      | 26/118 (22.0)  | 1.0                      |                |                             |                |
| Elementary                | 10/123 (8.1)   | 0.31 [0.14-0.68]         | 0.004          | NS                          | NS             |
| Secondary/high school     | 10/107 (9.3)   | 0.36 [0.16-0.79]         | 0.01           | NS                          | NS             |
| University                | 4/15 (26.7)    | 1.28 [0.37-4.37]         | NS             | NS                          | NS             |
| <b>Family income</b>      |                |                          |                |                             |                |
| < 1,000,000               | 3/33 (9.1)     | 1.0                      |                |                             |                |
| 1,000,000 - 3,000,000     | 44/301 (14.6)  | 1.71 [0.50-5.85]         | NS             | NA                          | NA             |
| > 3,000,000               | 3/29 (10.3)    | 1.15 [0.21-6.21]         | NS             | NA                          | NA             |

Categories were included in multivariable analysis when  $p \leq 0.2$  for one of the variables. NS=non-significant, NA=Not appropriate/not included in multivariable analysis

**Table S3.** Factors associated with anti-measles seropositivity and with anti-rubella seropositivity.

| Anti-measles seropositivity |                |                     |         |                     |         | Anti-rubella seropositivity |                   |         |                      |
|-----------------------------|----------------|---------------------|---------|---------------------|---------|-----------------------------|-------------------|---------|----------------------|
|                             | n/N (%)        | Crude OR [95% CI]   | p-value | Adjusted OR [95%CI] | p-value | n/N (%)                     | Crude OR [95% CI] | p-value | Adjusted OR [95% CI] |
| <b>Total</b>                | 220/363 (60.6) |                     |         |                     |         | 331/363 (91.2)              |                   |         |                      |
| <b>Sex</b>                  |                |                     |         |                     |         |                             |                   |         |                      |
| Female                      | 149/222 (67.1) | 1.0                 |         |                     |         | 201/222 (90.5)              | 1.0               |         |                      |
| Male                        | 70/141 (50.3)  | 0.49 [0.32-0.76]    | 0.002   | 0.58 [0.33-1.00]    | NS      | 130/141 (92.2)              | 1.23 [0.57-2.64]  | NS      | NA                   |
| <b>Age groups (years)</b>   |                |                     |         |                     |         |                             |                   |         |                      |
| 5-10                        | 18/72 (25.0)   | 1.0                 |         |                     |         | 66/72 (91.7)                | 1.0               |         |                      |
| 11-20                       | 27/85 (31.8)   | 1.39 [6.69-2.81]    | NS      | NS                  | NS      | 83/85 (97.6)                | 3.77 [0.73-19.30] | 0.1     | NS                   |
| 21-30                       | 48/66 (72.7)   | 8.00 [3.74-17.11]   | <0.001  | 3.47 [1.20-10.06]   | 0.02    | 57/66 (86.3)                | 0.57 [0.19-1.71]  | NS      | NS                   |
| 31-40                       | 41/45 (91.1)   | 30.75 [9.66-97.79]  | <0.001  | 10.44 [2.45-44.42]  | 0.001   | 41/45 (91.1)                | 0.93 [0.24-3.50]  | NS      | NS                   |
| > 40                        | 86/95 (90.5)   | 28.66 [12.01-68.39] | <0.001  | 10.48 [2.97-37.02]  | <0.001  | 84/95 (88.4)                | 0.69 [0.24-1.97]  | NS      | NS                   |
| <b>Ethnicity</b>            |                |                     |         |                     |         |                             |                   |         |                      |
| Lao-Tai                     | 88/141 (62.4)  | 1.0                 |         |                     |         | 129/141 (91.5)              | 1.0               |         |                      |
| Hmong-Mien                  | 94/156 (60.3)  | 0.91 [0.57-1.45]    | NS      | NA                  | NA      | 142/156 (91.0)              | 0.94 [0.42-2.11]  | NS      | NA                   |
| Mone-Kmae                   | 38/66 (57.6)   | 0.81 [0.45-1.48]    | NS      | NA                  | NA      | 60/66 (90.9)                | 0.93 [0.33-2.59]  | NS      | NA                   |
| <b>Religion</b>             |                |                     |         |                     |         |                             |                   |         |                      |
| Animist                     | 145/243 (59.7) | 1.0                 |         |                     |         | 223/243 (91.8)              | 1.0               |         |                      |
| Buddhist                    | 75/120 (62.5)  | 1.12 [1.14-1.19]    | NS      | NA                  | NA      | 108/120 (90.0)              | 0.80 [0.38-1.71]  | NS      | NA                   |
| <b>District</b>             |                |                     |         |                     |         |                             |                   |         |                      |
| Longxarn                    | 56/93 (60.2)   | 1.0                 |         |                     |         | 81/93 (87.1)                | 1.0               |         |                      |
| Hom                         | 58/83 (69.9)   | 1.53 [0.81-2.86]    | 0.1     | NS                  | NS      | 79/83 (95.2)                | 2.92 [0.90-9.45]  | 0.07    | NS                   |
| Longchaeng                  | 49/82 (59.8)   | 0.98 [0.53-1.79]    | NS      | NS                  | NS      | 77/82 (93.9)                | 2.28 [0.76-6.77]  | 0.1     | NS                   |
| Thathom                     | 57/105 (54.3)  | 0.78 [0.44-1.38]    | NS      | NS                  | NS      | 94/105 (89.5)               | 1.26 [0.53-3.02]  | NS      | NS                   |
| <b>Place of birth</b>       |                |                     |         |                     |         |                             |                   |         |                      |
| Provincial hospital         | 6/18 (33.3)    | 1.0                 |         |                     |         | 17/18 (94.4)                | 1.0               |         |                      |
| District hospital           | 9/41 (21.9)    | 0.56 [0.16-1.92]    | NS      | NS                  | NS      | 39/41 (95.1)                | 1.14 [0.09-13.52] | NS      | NA                   |
| Health care center          | 5/19(26.3)     | 0.71 [0.17-2.94]    | NS      | NS                  | NS      | 18/19 (94.7)                | 1.05 [0.06-18.30] | NS      | NA                   |

|                       |                   |                    |            |                  |      |                   |                  |      |    |
|-----------------------|-------------------|--------------------|------------|------------------|------|-------------------|------------------|------|----|
| At home               | 200/285<br>(70.2) | 4.70 [1.71-12.9]   | 0.003      | NS               | NS   | 257/285<br>(90.2) | [0.06-4.21]      | NS   | NA |
| <b>Marital status</b> |                   |                    |            |                  |      |                   |                  |      |    |
| Single                | 44/155<br>(22.4)  | 1.0                |            |                  |      | 147/155<br>(94.8) | 1.0              |      |    |
| Married               | 176/208<br>(84.6) | 13.87 [8.30-23.18] | <0.00<br>1 | 2.7 [1.09-37.02] | 0.03 | 184/208<br>(88.5) | 0.41 [0.18-0.95] | 0.03 | NS |
| <b>Education</b>      |                   |                    |            |                  |      |                   |                  |      |    |
| None                  | 91/118<br>(51.7)  | 1.0                |            |                  |      | 107/118<br>(90.7) | 1.0              |      |    |
| Elementary            | 83/123<br>(67.5)  | 1.93 [1.15-3.26]   | 0.01       | NS               | NS   | 109/123<br>(88.6) | 0.80 [0.34-1.84] | NS   | NA |
| Secondary/high school | 66/107<br>(61.7)  | 1.50 [0.88-2.55]   | 0.1        | NS               | NS   | 100/107<br>(93.5) | 1.46 [0.54-3.93] | NS   | NA |
| University            | 10/15 (66.7)      | 1.86 [0.60-5.80]   | 0.2        | NS               | NS   | 15/15 (100)       |                  |      |    |
| <b>Family income</b>  |                   |                    |            |                  |      |                   |                  |      |    |
| < 1,000,000           | 19/33 (57.6)      | 0.1                |            |                  |      | 32/33 (96.9)      | 1.0              |      |    |
| 1,000,000 – 3,000,000 | 186/301<br>(61.8) | 1.19 [0.57-2.46]   | NS         | NA               | NA   | 272/301<br>(90.4) | 0.29 [0.03-2.22] | 0.2  | NS |
| > 3,000,000           | 15/29 (51.7)      | 0.78 [0.28-2.15]   | NS         | NA               | NA   | 27/29 (93.1)      | 0.4 [0.03-4.91]  | NS   | NS |

Categories were included in multivariable analysis when  $p \leq 0.2$  for one of the variables. NS=non-significant, NA=Not appropriate/not included in multivariable analysis

**Table S4.** Factors associated with anti-tetanus seroprotection (> 0.5 IU/mL).

|                           | <i>n/N (%)</i> | <b>Crude OR [95% CI]</b> | <i>p-value</i> | <b>Adjusted OR [95% CI]</b> | <i>p-value</i> |
|---------------------------|----------------|--------------------------|----------------|-----------------------------|----------------|
| Total                     | 172/363 (47.4) |                          |                |                             |                |
| <b>Sex</b>                |                |                          |                |                             |                |
| Female                    | 143/222 (64.1) | 1.0                      |                |                             |                |
| Male                      | 29/141 (20.6)  | 0.14 [0.08-0.23]         | <0.001         | 0.12 [0.07-0.21]            | <0.001         |
| <b>Age groups (years)</b> |                |                          |                |                             |                |
| 5-10                      | 23/72 (31.9)   | 1.0                      |                |                             |                |
| 11-20                     | 39/85 (45.9)   | 1.80 [0.93-3.47]         | 0.07           | 2.10 [0.99-4.43]            | 0.05           |
| 21-30                     | 35/66 (53.0)   | 2.40 [1.20-4.80]         | 0.01           | 2.65 [1.17-6.00]            | 0.01           |
| 31-40                     | 34/45 (75.6)   | 6.58 [2.83-15.27]        | <0.001         | 6.47 [2.48-16.85]           | <0.001         |
| > 40                      | 41/95 (43.2)   | 1.61 [0.85-3.06]         | <0.001         |                             |                |
| <b>Ethnicity</b>          |                |                          |                |                             |                |
| Hmong-Mien                | 58/156 (37.2)  | 1.0                      |                |                             |                |
| Mone-Kkmer                | 32/66 (48.5)   | 1.59 [0.88-2.84]         | 0.1            | NS                          | NS             |
| Lao-Tai                   | 82/141 (58.2)  | 2.34 [1.47-3.74]         | <0.001         | NS                          | NS             |
| <b>Religion</b>           |                |                          |                |                             |                |
| Animist                   | 98/243 (40.3)  | 1.0                      |                |                             |                |
| Buddhist                  | 74/120 (61.7)  | 2.38 [1.52-3.72]         | <0.001         | 2.80 [1.40-5.67]            | 0.003          |
| <b>District</b>           |                |                          |                |                             |                |
| Longxarn                  | 34/93 (36.6)   | 1.0                      |                |                             |                |
| Hom                       | 40/83 (48.2)   | 1.61 [0.88-2.94]         | 0.1            | 2.37 [1.16-4.86]            | 0.01           |
| Longchaeng                | 36/82 (43.9)   | 1.35 [0.74-2.49]         | NS             | NS                          | NS             |
| Thathom                   | 62/105 (59.1)  | 2.50 [1.40-4.44]         | 0.002          | 2.60 [1.19-5.65]            | 0.01           |
| <b>Place of birth</b>     |                |                          |                |                             |                |
| Provincial hospital       | 8/18 (44.4)    | 1.0                      |                |                             |                |
| District hospital         | 16/41 (39.0)   | 0.80 [0.26-2.45]         | NS             | NA                          | NA             |
| Health care center        | 8/19 (42.1)    | 0.90 [0.24-3.34]         | NS             | NA                          | NA             |
| At home                   | 140/285(49.1)  | 1.20 [0.46-3.14]         | NS             | NA                          | NA             |
| <b>Marital status</b>     |                |                          |                |                             |                |
| Married                   | 61/155 (39.4)  | 1.0                      |                |                             |                |
| Single                    | 111/208 (53.4) | 1.76 [1.15-2.68]         | 0.008          | NS                          | NS             |
| <b>Education</b>          |                |                          |                |                             |                |
| None                      | 45/118 (38.1)  | 1.0                      |                |                             |                |
| Elementary                | 72/123 (58.5)  | 2.29 [1.36-3.83]         | 0.002          | NS                          | NS             |
| Secondary/high school     | 49/107 (45.8)  | 1.37 [0.80-2.33]         | 0.2            | NS                          | NS             |
| University                | 6/15 (40.0)    | 1.08 [0.36-3.24]         | NS             | NS                          | NS             |
| <b>Family income</b>      |                |                          |                |                             |                |
| < 1,000,000               | 19/33 (57.6)   | 1.0                      |                |                             |                |
| 1,000,000 – 3,000,000     | 138/301 (45.8) | 0.62 [0.30-1.29]         | 0.2            | NS                          | NS             |
| > 3,000,000               | 15/29 (51.7)   | 0.78 [0.28-2.15]         | NS             | NS                          | NS             |

Categories were included in multivariable analysis when  $p \leq 0.2$  for one of the variables.

NS=non-significant, NA=Not appropriate/not included in multivariable analysis
